# Supplementary material for: Microglia Induce PDGFRB Expression in Glioma Cells to Enhance Their Migratory Capacity
Source: PubMed Central journal article supplement — iScience. 2018 Oct 16;9:71–83. doi: 10.1016/j.isci.2018.10.011 (PMC6214839; doi:10.1016/j.isci.2018.10.011), 2018-10-16
Supplement: mmc1.pdf [file mmc1.pdf]

**ISCI, Volume 9**

## **Supplemental Information**

### **Microglia Induce PDGFRB**

#### **Expression in Glioma Cells**

#### **to Enhance Their Migratory Capacity**

**Tatjana Wallmann, Xing-Mei Zhang, Majken Wallerius, Sara Bolin, Anne-Laure Joly, Caroline Sobocki, Lina Leiss, Yiwen Jiang, Jonas Bergh, Eric C. Holland, Per Ø. Enger, John Andersson, Fredrik J. Swartling, Hrvoje Miletic, Lene Uhrbom, Robert A. Harris, and Charlotte Rolny**

Figure S1

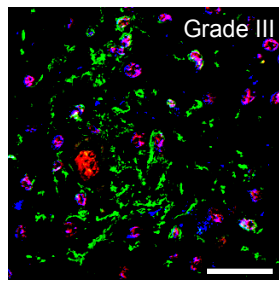

IDH1-R132H  $\alpha$ -SMA IBA1

SUPPLEMENTAL FIGURE LEGEND

**Figure S1. [ $\alpha$ -SMA<sup>+</sup> glioma cells are in close proximity to IBA1<sup>+</sup> TAMMs], Related to Figure 4.**

Human Grade III astrocytoma sections were immunostained for IDH1-R132H (blue),  $\alpha$ -SMA (red) and IBA1 (green). Bars 50  $\mu$ m.

Figure S2

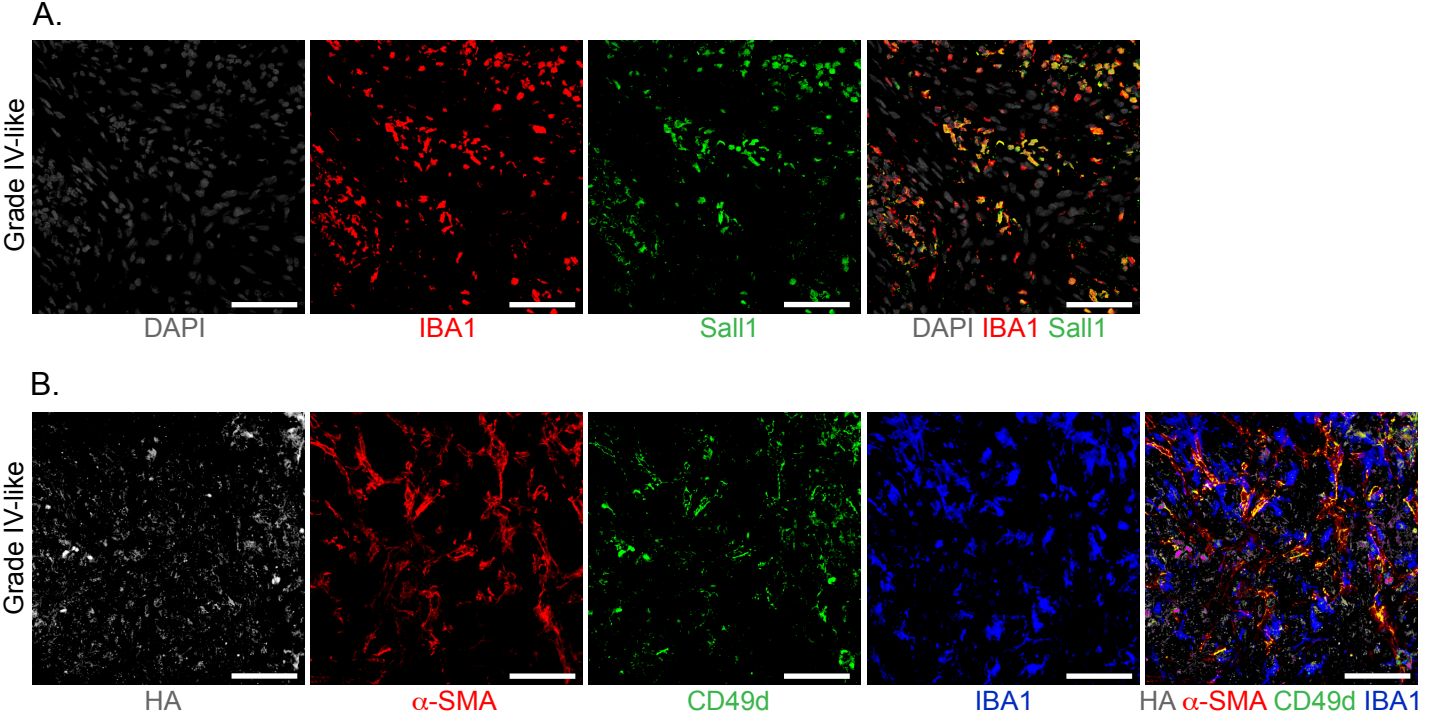

## SUPPLEMENTAL FIGURE LEGEND

### **Figure S2. [IBA1<sup>+</sup> TAMMs express Sall1], Related to Figure 5.**

(A) Mouse Grade IV-like glioma sections were immunostained for DAPI (grey), IBA1 (red) and Sall1 (green). Bars 50  $\mu$ m.

(B) Mouse Grade IV-like glioma sections were immunostained for HA (grey),  $\alpha$ -SMA (red), CD49d (green) and IBA1 (blue). Bars 50  $\mu$ m.

**TABLE S1. [Quantitative PCR Probes], Related to Figure 6.**

TaqMan probes (Life Technologies)

|                  |               |
|------------------|---------------|
| <i>α-sma</i>     | Mm00725412_s1 |
| <i>pdgfrb</i>    | Mm00435546_m1 |
| <i>β-actin</i>   | Mm00607939_s1 |
| <i>cxcl9</i>     | Mm00434946_m1 |
| <i>cxcl10</i>    | Mm00445235_m1 |
| <i>cxcl11</i>    | Mm00444662_m1 |
| <i>il-6</i>      | Mm00446190_m1 |
| <i>il-1b</i>     | Mm01336189_m1 |
| <i>arginase1</i> | Mm00475988_m1 |
| <i>mrc1</i>      | Mm01329362_m1 |
| <i>ym1</i>       | Mm00657889_mH |

SYBR green probes (Sigma)

|               |                                                            |
|---------------|------------------------------------------------------------|
| <i>pdgfra</i> | FW 5'-ATATTTGAGACATTGCTGGC<br>RW 5'-CTAGTTCCTGCATCCATTTTG  |
| <i>egfr</i>   | FW 5'-CTGTCGCAAAGTTTGTAATG<br>RW 5'-GAATTTCTAGTTCTCGTGGG   |
| <i>fgfr</i>   | FW 5'-TATGTCCAGATCCTGAAGAC<br>RW 5'-GAGAGTCCGATAGAGTTACC   |
| <i>hgfr</i>   | FW 5'-CGACAAATACGTTGAAATGC<br>RW 5'-GATCTACATAGGAGAATGCAC  |
| <i>igf-1r</i> | FW 5'-AGAACCGAATCATCATAACG<br>RW 5'-TTTTAAATGGTGCCTCCTTG   |
| <i>cnp</i>    | FW 5'-CTTCGACACTTTATTTCTGGAG<br>RW 5'-AATTTGGTTGTACAGTGCAG |
| <i>gfap</i>   | FW 5'-GGAAGATCTATGAGGAGGAAG<br>RW 5'-CTGCAAACCTTAGACCGATAC |

|                |                                                           |
|----------------|-----------------------------------------------------------|
| <i>hes1</i>    | FW 5'-AAGCCTATCATGGAGAAGAG<br>RW 5'-GGAGCTATCTTTCTTAAGTGC |
| <i>ng2</i>     | FW 5'-GGCAGCACTGCCTCCTGGAC<br>RW 5'-CCCTGGCCCCACTGCAACTG  |
| <i>β-actin</i> | FW 5'-GATGTATGAAGGCTTTGGTC<br>RW 5'-TGTGCACTTTTATTGGTCTC  |

SYBR green probes (QIAGEN)

|               |            |
|---------------|------------|
| <i>nestin</i> | QT00316799 |
| <i>olig2</i>  | QT01041089 |
| <i>sox2</i>   | QT02249347 |

## TRANSPARENT METHODS

### **Mouse tumor models**

We used a PDGF-B-driven replication-competent leukosis virus splice acceptor (RCAS)/*tv-a* mouse glioma model in which transgenic expression of the avian *tv-a* receptor expression is under the nestin (NES) promoter (Holland and Varmus, 1998) in a homozygous p19Arf-deficient (*Arf<sup>-/-</sup>*) background and denoted *N/tv-a;Arf<sup>-/-</sup>* mice (Tchougounova et al., 2007). In order to induce glioma,  $4 \times 10^5$  RCAS virus-encoding PDGF-B-producing DF-1 chicken fibroblasts were transplanted through intracerebral injections into neonatal mice. RCAS is replication incompetent in mammalian cells and infection of nestin-expressing target cells will occur during the first days after injection. Within three months injected mice will develop gliomas with different degree of malignancies (Karrlander et al., 2009; Tchougounova et al., 2007). Experiments were conducted in accordance with the local Animal Ethics Committee decision C300/10.

### **Patient glioma material**

Paraffin-embedded human astrocytoma samples were obtained from the Research Biobank for intracranial neoplasms at Bergen University, Bergen, Norway. Surgical specimens were collected during surgical resections at the Department of Neurosurgery, Haukeland Univeristy Hospital, Bergen, Norway. All material in the Research Biobank was collected with written informed consent from patients and the Biobank is approved by the regional ethical committee (013.09, 2013/720 and 2018/1520).

### **Histological analysis**

Tumor samples embedded in paraffin or in OCT were cut in 6 $\mu$ m or 10 $\mu$ m thick sections, and stained as previously described (Wallerius et al., 2016). Tumor



sections were stained with hematoxylen harris and eosin (HistoLab) or treated for antigen retrieval with sodium citrate buffer (Thermo Scientific Fisher and Biocare Medical) and immunostained with appropriate antibodies: anti-CD31 (Santa Cruz), Podocalyxin (R&D systems),  $\alpha$ -SMA (Sigma), PDGFRB (Cell Signalling and Abcam), CD44 (Santa Cruz), Sox2, GFAP, Olig2 and NG2 (Millipore), Ki67 (Abcam), MRC1 (CD206; AbD), Iba 1 (Wako chemicals and Abcam), HA (Acris and Abcam), GFAP (Abcam), IDH-R132H (Dianova); streptavidin and all secondary antibodies were conjugated with AlexaFluor 405, AlexaFluor 488, AlexaFluor 546, AlexaFluor 555 or AlexaFluor 647 fluorochromes (Molecular Probes). Cell nuclei were labeled with DAPI (Invitrogen Corp). Tumor hypoxia was detected by intraperitoneal injection of 60mg/kg pimonidazole hydrochloride (HypoxiProbe) into tumor-bearing mice. Vessel functionality was assessed by intravenous injection of 1mg of FITC-conjugated lectin (Molecular Probes) into tumor-bearing mice (this compound binds to the inner lumen of vessels) (Criscuoli et al., 2005; Dreher et al., 2006). Ten minutes later mice were sacrificed and their brains were fixed in 4% formalin and embedded in paraffin or in OCT embedding material and frozen in isobutanol on dry ice. At least 6 independent fields from sections from each tumor were analyzed by using LSM 510 META, LSM700 META and LSM T-PMT Zeiss confocal microscopes and quantified using ImageJ software.

### **Primary mouse glioma cells**

The cultured mouse glioma stem cells were derived from RCAS-PDGF-B-induced grade IV gliomas in *N/tv-a;Arf<sup>-/-</sup>* mice (Jiang et al., 2017) and cultured under stem cell conditions as previously described (Jiang et al., 2011). These cells have all functional characteristics of GBM stem cells and will be denoted GSCs.

### **Isolation of microglia**

6-to-8-week-old naïve mice were deeply anesthetized and perfused with ice-cold PBS (Sigma). Brains were removed without meninges, enzymatically digested and resuspended in 0.5 mg/ml DNaseI in HBSS. Cell pellets were resuspended in DMEM/F12 complete (complemented with 10% FBS, 1% Penicillin Streptomycin (P/S, 100 units/ml) and 1% Glutamine (100µg/ml, Sigma) supplemented with Macrophage Colony Stimulating Factor (M-CSF) (20ng/ml, Miltenyi) and cultured at 37°C and 5% CO<sub>2</sub>. The primary cells were cultured until 80% confluence. Microglia were isolated with CD11b magnetic microbeads (Miltenyi Biotec 130-049-601) according to the manufacturer's instructions and seeded in DMEM/F12 medium complete supplemented with 50ng/ml M-CSF (Zhang et al., 2014).

### **Isolation of BMDMs**

Bone marrow precursors were acquired by flushing the bone marrow from the femurs and tibias of 6-to-8-week-old naïve BALB/c mice. Erythrocytes were lysed with red blood cell lysis buffer (RCB, Sigma) and cells were cultured in RPMI-1640 medium supplemented with 10% FBS, 1% P/S (Gibco), 1% Glutamine (Gibco) and 50ng/ml M-CSF (Miltenyi) for 6-to-7 days (Wallerius et al., 2016).

### **M1- or M2- polarized microglia and BMDMs**

Microglia or BMDMs were polarized to either an M1-phenotype (100 ng/ml LPS (Sigma) and 200 units/ml IFN $\gamma$  (Peprotech)) or an M2-phenotype (20 ng/ml IL-4 (Peprotech), 10 ng/ml TGF- $\beta$  (Peprotech), 20 ng/ml IL-10 (R&D)) for 24 hours.

### **Co-culture experiments**

M1- and M2-polarized microglia or M1- and M2-polarized BMDMs were washed two times with PBS before N/tv-a PDGF-B GFP<sup>+</sup>GCSs were added and co-cultured with or without M1- or M2-polarized microglia or M1- or M2-polarized BMDMs for 24h at

37°C. Control medium (M0) or conditioned medium from M1- or M2-polarized microglia was added to N/tv-a PDGF-B GFP<sup>+</sup>GCSs for 24 h at 37°C. GFP<sup>+</sup>GCSs were then flow-sorted and subjected to RNA isolation and cDNA synthesis.

### **RNA Extraction, cDNA Synthesis and quantitative RT-PCR**

Total RNA was extracted from N/tv-a PDGF-B GFP<sup>+</sup>GCSs, microglia or BMDMs. Cells were collected in RLT buffer and RNA was extracted and cDNA synthesized from collected glioma cells, microglia or BMDMs as previously described. Gene expression was analyzed by performing quantitative RT-PCR. TaqMan and SyBr green probes are listed in Supplemental table 1.

### **Migration Assay**

The mouse glioma cells were co-cultured with M1- or M2-polarized microglia for 8h before they were seeded on laminin (5 µg/ml)-coated transwell membranes (VWR) +/- 10 µg/ml PDGFRB neutralizing antibody (ThermoFisher) for 24h at 37°C. Cells in the upper part of the membrane were removed. The membranes were fixed in 4% paraformaldehyde and immunostained with an Olig2 antibody (Millipore) and the appropriate secondary antibody conjugated with AlexaFluor 488 (Molecular Probes). Cell nuclei were labeled with DAPI. Cells were counted using a LSM T-PMT Zeiss confocal microscope and quantified using ImageJ software.

### **Statistical analysis**

In all studies, values are expressed as Standard Deviation (SD) and mean. Statistical analyses were performed using One-way ANOVA. Stars and hash tags in the graphs indicate significance as depicted in figure legends. Differences were considered statistically significant at  $p < 0.05$ .
